# Supplementary material for: Effect of Bariatric Surgery on Adipose Tissue Glucose Metabolism in Different Depots in Patients With or Without Type 2 Diabetes
Source: Oxford University Press journal article supplement (doi:10.2337/dc15-1447), 2015-12-17

SUPPLEMENTARY DATA

**Supplementary Table 1. Fasting glucose uptake in different fat compartments and skeletal muscle.\***

|                                                                                                          | Controls (n= 10) | Obese patients (n = 23)         |                   |
|----------------------------------------------------------------------------------------------------------|------------------|---------------------------------|-------------------|
|                                                                                                          |                  | Before surgery                  | After surgery     |
| <b>Tissue-specific glucose uptake (<math>\mu\text{mol}\cdot\text{L}^{-1}\cdot\text{min}^{-1}</math>)</b> |                  |                                 |                   |
| Extraperitoneal fat                                                                                      | 7.8 $\pm$ 2.2    | 5.7 $\pm$ 1.3 †                 | 6.9 $\pm$ 2.4     |
| Intraperitoneal fat                                                                                      | 8.0 $\pm$ 1.4    | 8.0 $\pm$ 1.6 # <sup>b</sup>    | 9.5 $\pm$ 2.6     |
| Abdominal deep SC                                                                                        | 4.2 $\pm$ 1.6    | 4.3 $\pm$ 1.1 # <sup>a</sup>    | 4.9 $\pm$ 1.2     |
| Abdominal superficial SC                                                                                 | 4.5 $\pm$ 1.7    | 4.5 $\pm$ 1.4 #                 | 5.6 $\pm$ 1.9     |
| Femoral SC                                                                                               | 2.1 $\pm$ 0.4    | 3.1 $\pm$ 1.0 †                 | 2.9 $\pm$ 0.9     |
| Humeral SC                                                                                               | 5.0 $\pm$ 2.4    | 5.1 $\pm$ 1.6 # <sup>a</sup>    | 6.9 $\pm$ 2.3     |
| Thoracic SC                                                                                              | 5.8 $\pm$ 3.1    | 6.2 $\pm$ 2.1                   | 6.8 $\pm$ 2.2     |
| Skeletal muscle                                                                                          | 7.7 $\pm$ 1.7    | 7.8 $\pm$ 1.9 #                 | 8.0 $\pm$ 1.8     |
| <b>Depot-specific glucose uptake (<math>\mu\text{mol}\cdot\text{min}^{-1}</math>)</b>                    |                  |                                 |                   |
| Extraperitoneal fat                                                                                      | 8.6 $\pm$ 3.9    | 13.7 $\pm$ 6.3 # <sup>a</sup> † | 10.1 $\pm$ 5.4 °  |
| Intraperitoneal fat                                                                                      | 9.5 $\pm$ 5.5    | 27.9 $\pm$ 7.9 #†               | 17.7 $\pm$ 7.4 °  |
| Abdominal deep SC                                                                                        | 6.2 $\pm$ 4.3    | 25.5 $\pm$ 8.3 †                | 17.1 $\pm$ 5.4 °  |
| Abdominal superficial SC                                                                                 | 7.5 $\pm$ 4.3    | 31.3 $\pm$ 18.5 †               | 22.7 $\pm$ 10.1 ° |
| Femoral SC                                                                                               | 15.8 $\pm$ 5.4   | 55.4 $\pm$ 21.2 †               | 37.5 $\pm$ 17.4 ° |
| Humeral SC                                                                                               | 2.5 $\pm$ 2.0    | 5.5 $\pm$ 2.0 †                 | 5.4 $\pm$ 2.0     |
| Thoracic SC                                                                                              | 8.4 $\pm$ 5.5    | 31.9 $\pm$ 10.4 †               | 23.6 $\pm$ 8.6 °  |
| VF/WB (%)                                                                                                | -                | -                               | -                 |
| SC/WB (%)                                                                                                | -                | -                               | -                 |
| Total fat/WB                                                                                             | -                | -                               | -                 |

\* Data are mean ± SD; SC, subcutaneous fat, VF, visceral fat; †  $p \leq 0.05$  or less for the comparison of pre-surgery patients with controls; #  $p \leq 0.05$  or less for the difference between ND and T2D at baseline; °  $p \leq 0.05$  or less for the effect of surgery; <sup>a</sup> T2D > ND; <sup>b</sup> T2D < ND.

## SUPPLEMENTARY DATA

### Supplementary Figure S1.

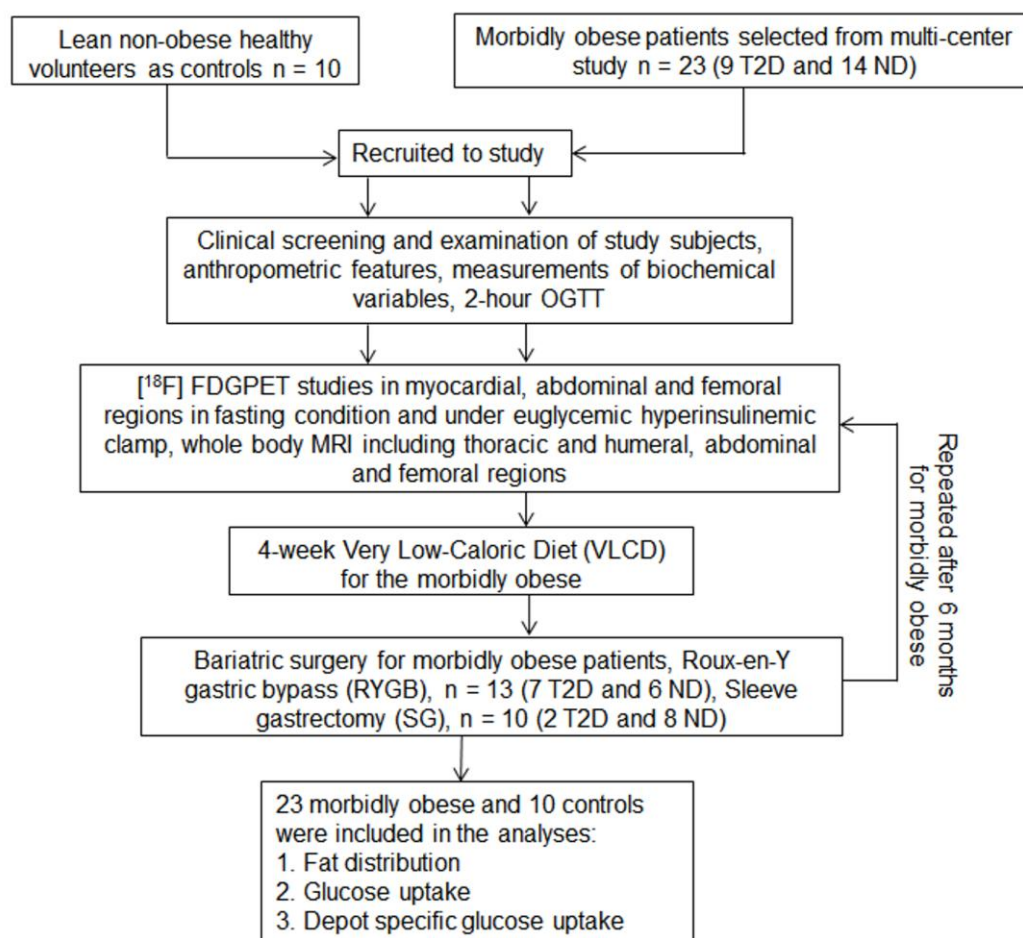

SUPPLEMENTARY DATA

Supplementary Figure S2.

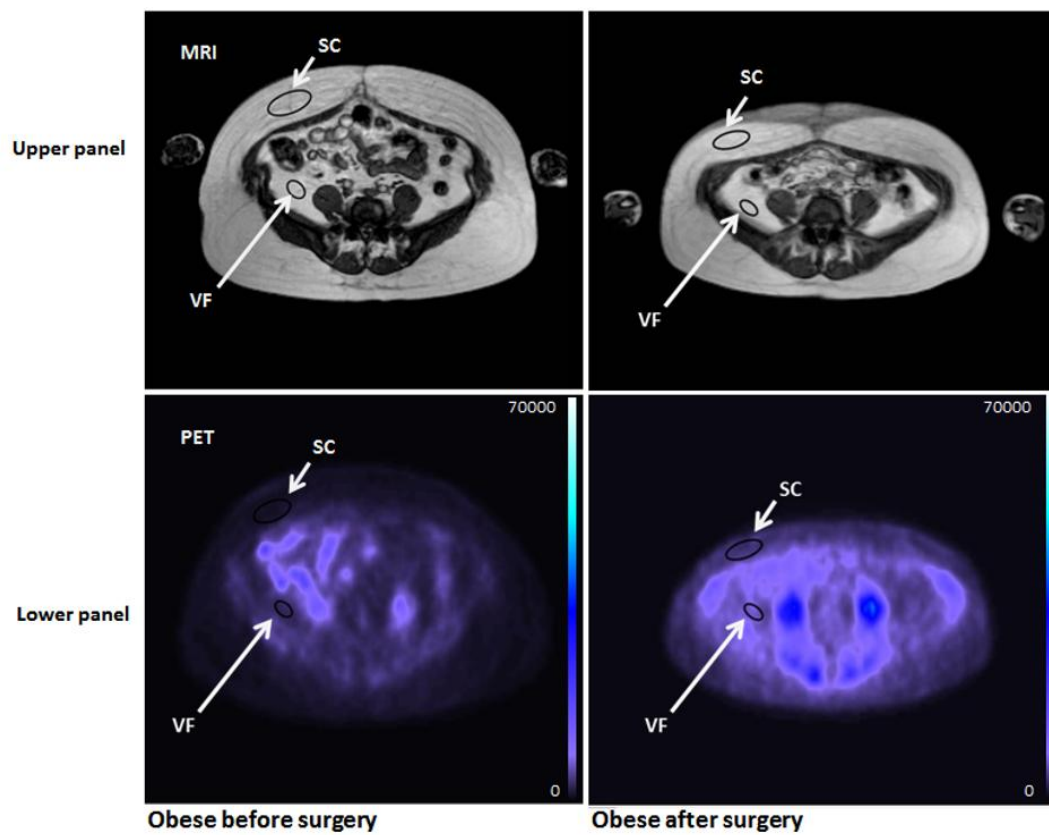

Supplement: dc151447supplementarydata.pdf [file dc151447supplementarydata.pdf]
